# Supplementary material
Source: publisher figshare collection journal article supplement (https://aacr.figshare.com/ndownloader/files/41457850)
Supplement: Supplementary file 1 [file 41457850]

## Early-onset esophagogastric adenocarcinoma

**Supplementary Table 1.** Esophagogastric adenocarcinoma subtypes according to the International Classification of Diseases for Oncology 2nd revision (ICD-O-2).

| <b>Topography</b>     | <b>ICD-O-2</b>                | <b>Morphology</b>             | <b>ICD-O-2</b> |
|-----------------------|-------------------------------|-------------------------------|----------------|
| Esophageal            | C15                           | Intestinal including Barret's | 81403          |
| Non-distal            | C150 C151 C153 C154           | Mucinous                      | 84803          |
| Distal                | C152 C155                     | Tubular                       | 82113          |
| Unspecified           | C158 C159                     | Tubulovillous                 | 82603          |
| Gastric cardia        | C160                          | Signet ring cell              | 84903          |
| Gastric non-cardia    | C161 C162 C163 C164 C165 C166 |                               |                |
| including unspecified | C168 C169                     |                               |                |
